# Supplementary material
Source: MDPI journal article supplement (https://www.mdpi.com/1424-2818/14/8/690)
Supplement: s1 [file s1 › diversity-1845518-supplementary.pdf]

### **Supplementary information S1**

The bioclimatic factors used in the study can be downloaded from this link:

<https://www.worldclim.org/data/worldclim21.html#>

Details about the 19 bioclimatic variables are available on this link:

<https://www.worldclim.org/data/bioclim.html>

### **Supplementary information S2**

The future models (CMIP6) are available on this link:

<https://www.worldclim.org/data/cmip6/cmip6climate.html>

In this study, two future climatic models were used at two Shared Socio-economic Pathways (SSPs): ssp126 and ssp585 for 2050 (2041-2060). 2.5 minutes = 5 Km<sup>2</sup> spatial distance was used in the study.

(1) BCC-CSM2-MR (Institution ID: BCC)

(2) MRI-ESM2-0 (Institution ID: MRI)

These models (bc was selected to download the 19 bioclimatic variables) are available on:

[https://www.worldclim.org/data/cmip6/cmip6\\_clim2.5m.html](https://www.worldclim.org/data/cmip6/cmip6_clim2.5m.html)

### Supplementary Figures (1 to 11)

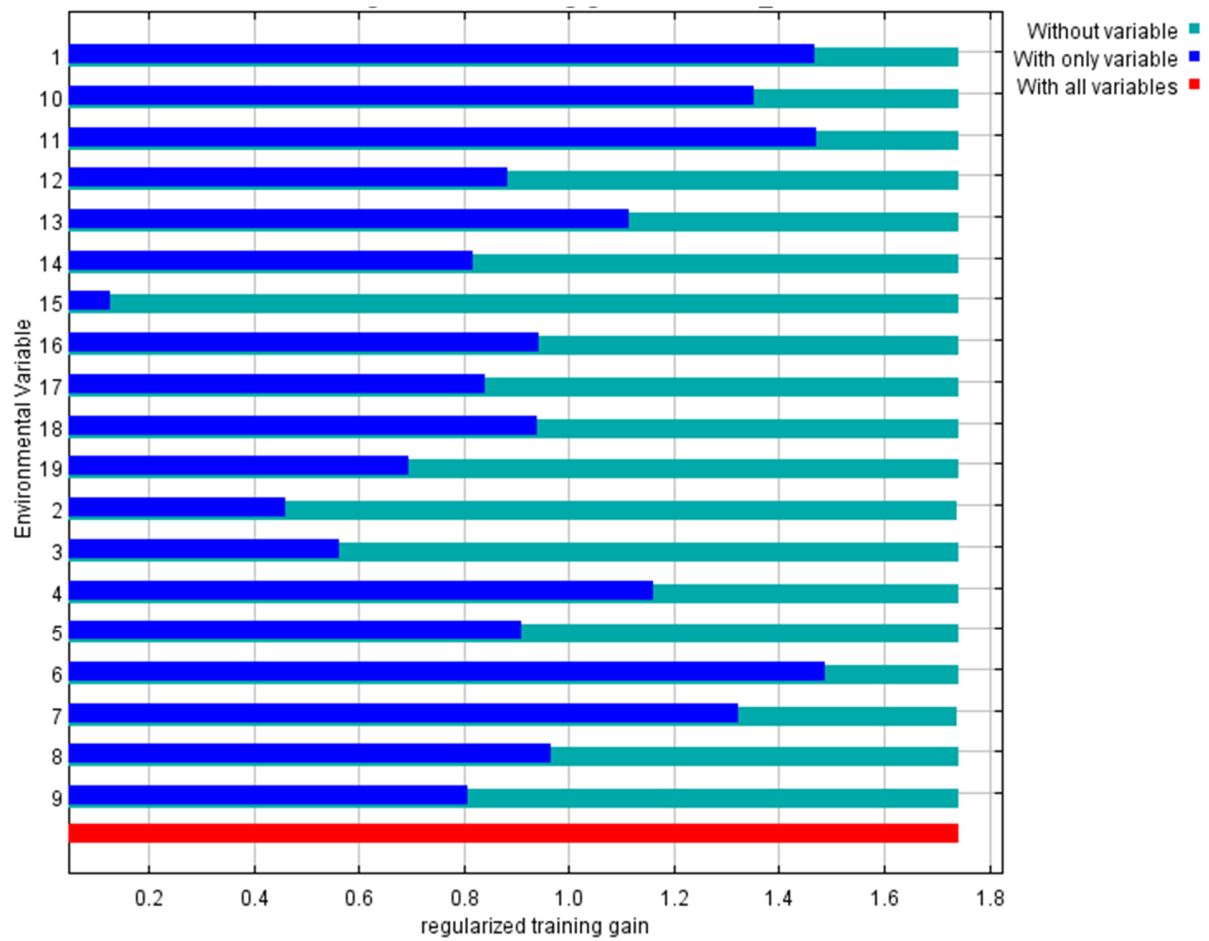

**Figure S1.** The jackknife test of regularized training gain considering 19 environmental variables.

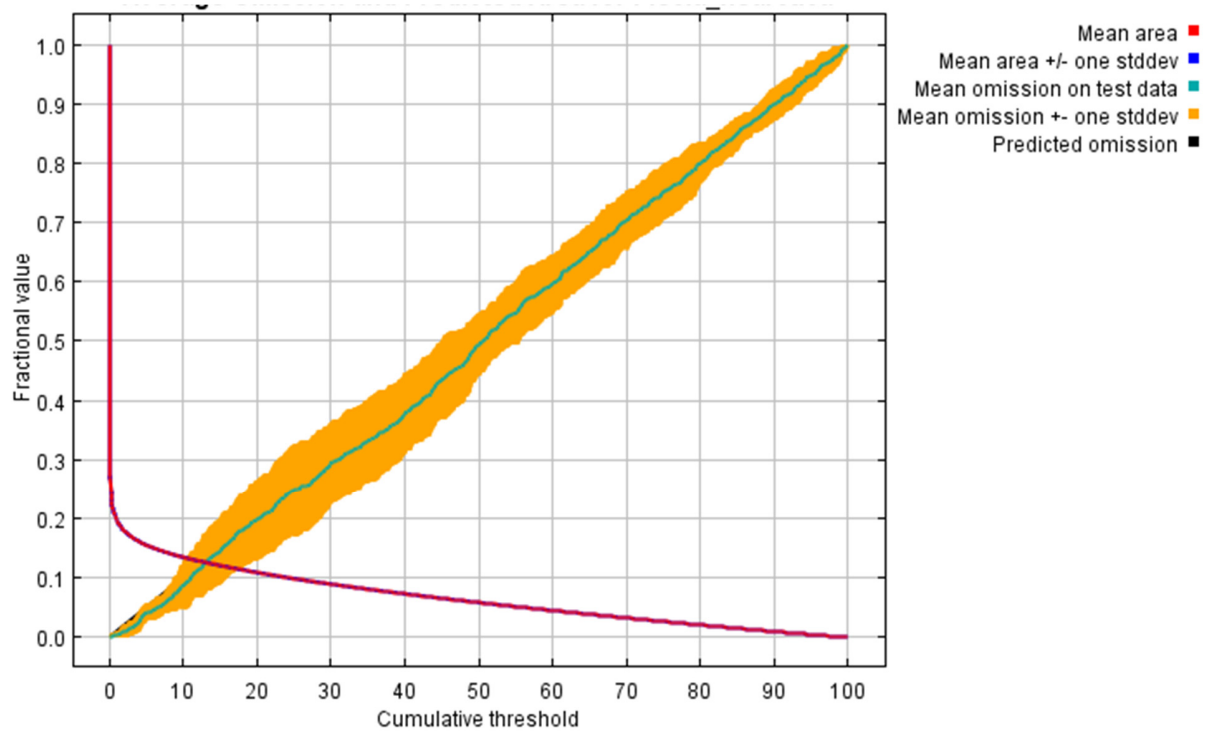

**Figure S2.** Average omission and predicated area for *Plecia nearctica*.

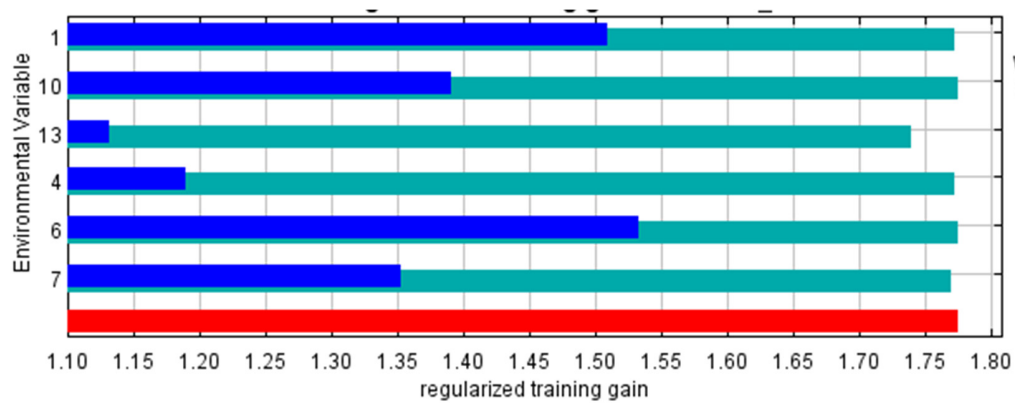

**Figure S3.** The jackknife of regularized gain for *Plecia nearctica*. 1: Annual mean temperature, 4: Temperature seasonality, 6: Minimum temperature of coldest month, 7: Temperature annual range, 10: Mean temperature of warmest quarter, and 13: Precipitation of wettest month.

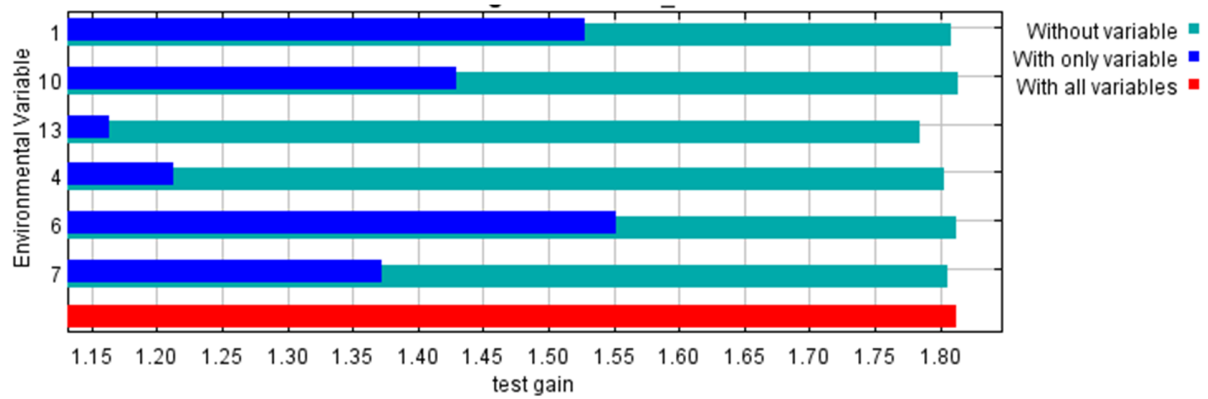

**Figure S4.** The jackknife of test gain for *Plecia nearctica*. 1: Annual mean temperature, 4: Temperature seasonality, 6: Minimum temperature of coldest month, 7: Temperature annual range, 10: Mean temperature of warmest quarter, and 13: Precipitation of wettest month.

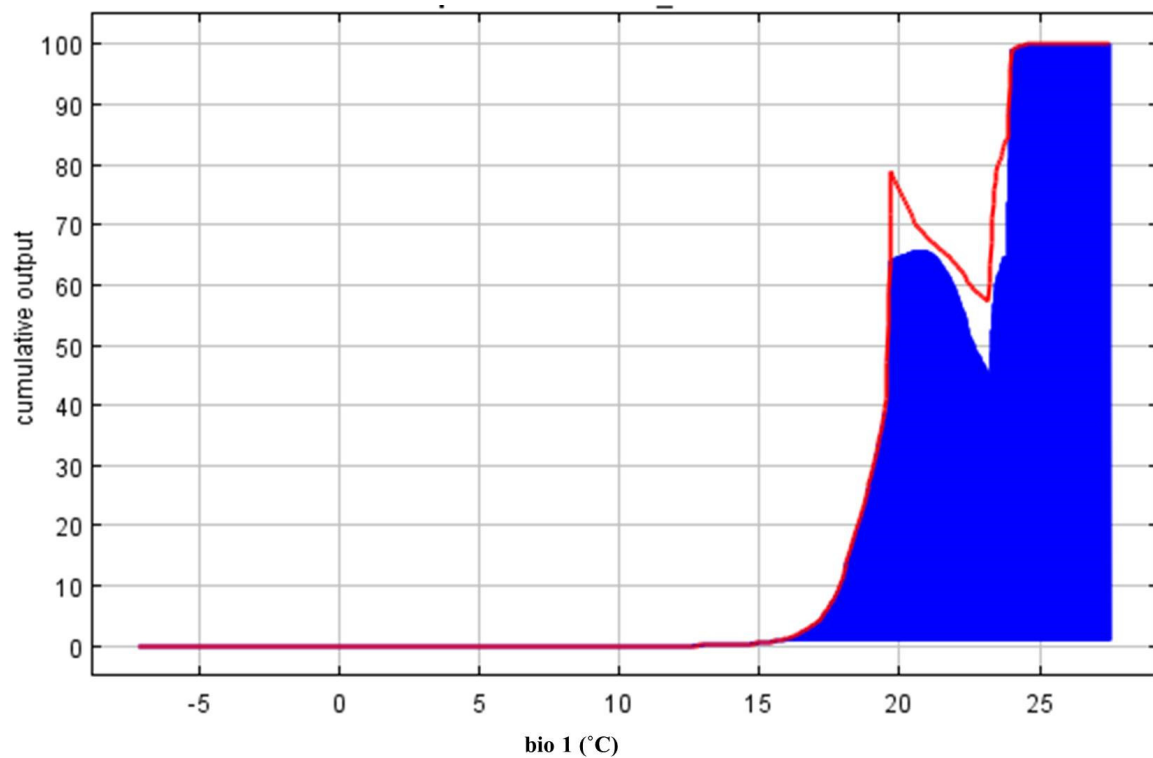

**Figure S5.** Response curve for Annual Mean Temperature (bio1).

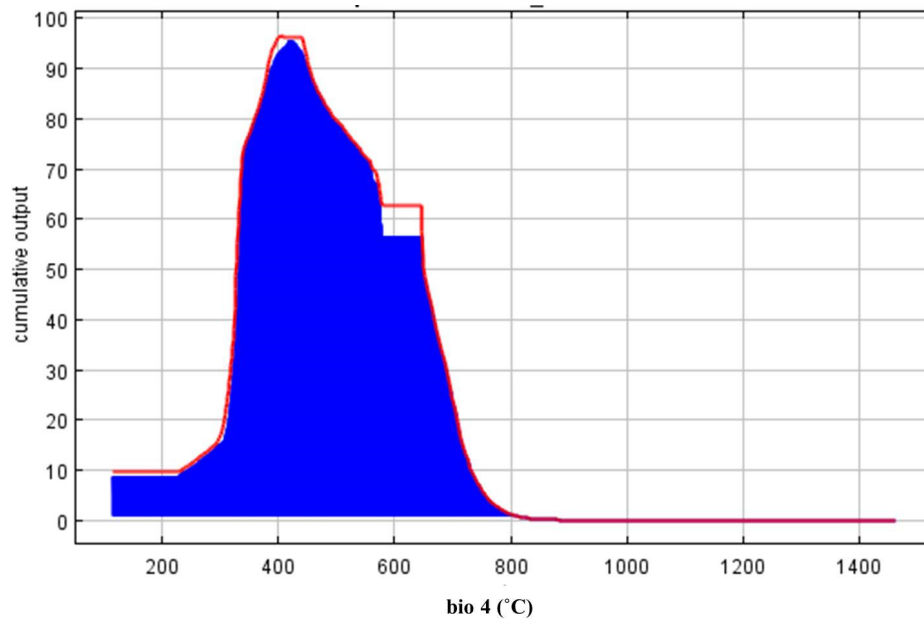

**Figure S6.** Response curve for Temperature Seasonality (bio 4) (=standard deviation  $\times 100$ ).

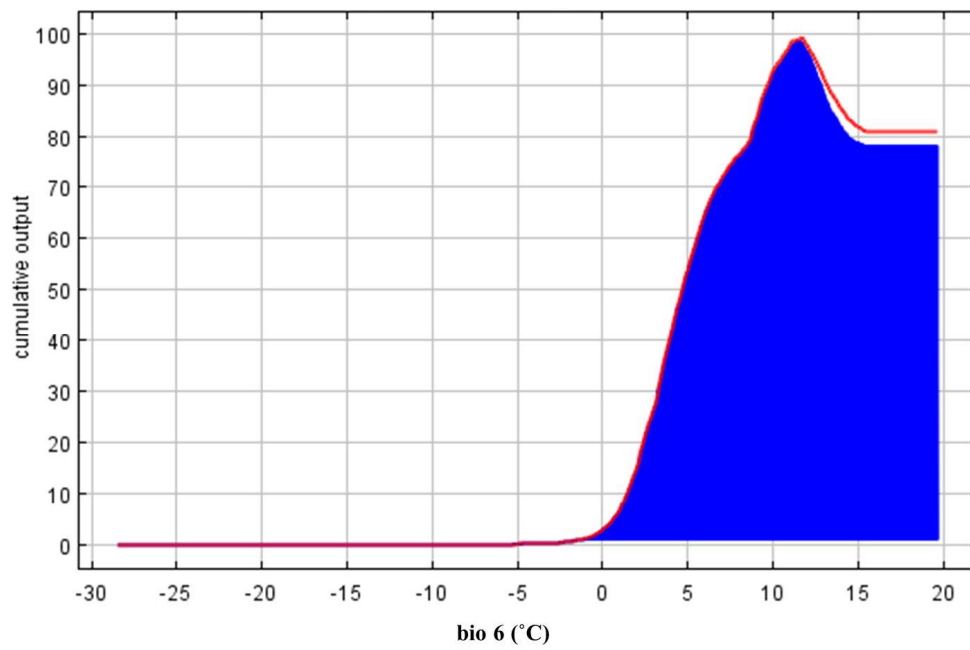

**Figure S7.** Response curve for Min Temperature of Coldest Month (bio 6).

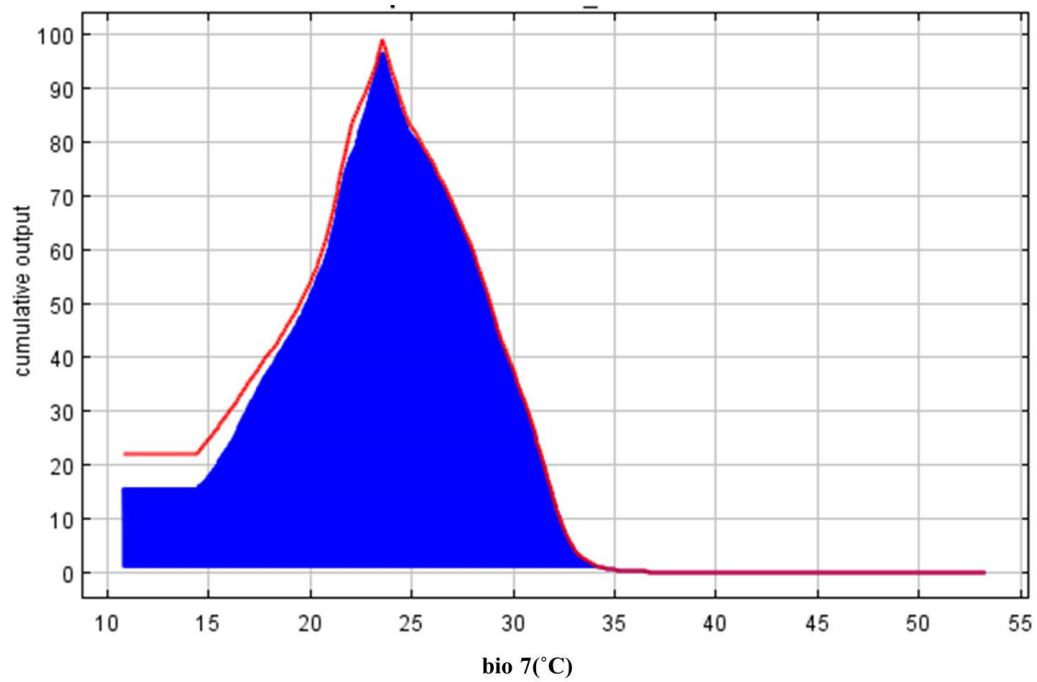

**Figure S8.** Response curve for Temperature Annual Range (bio 7).

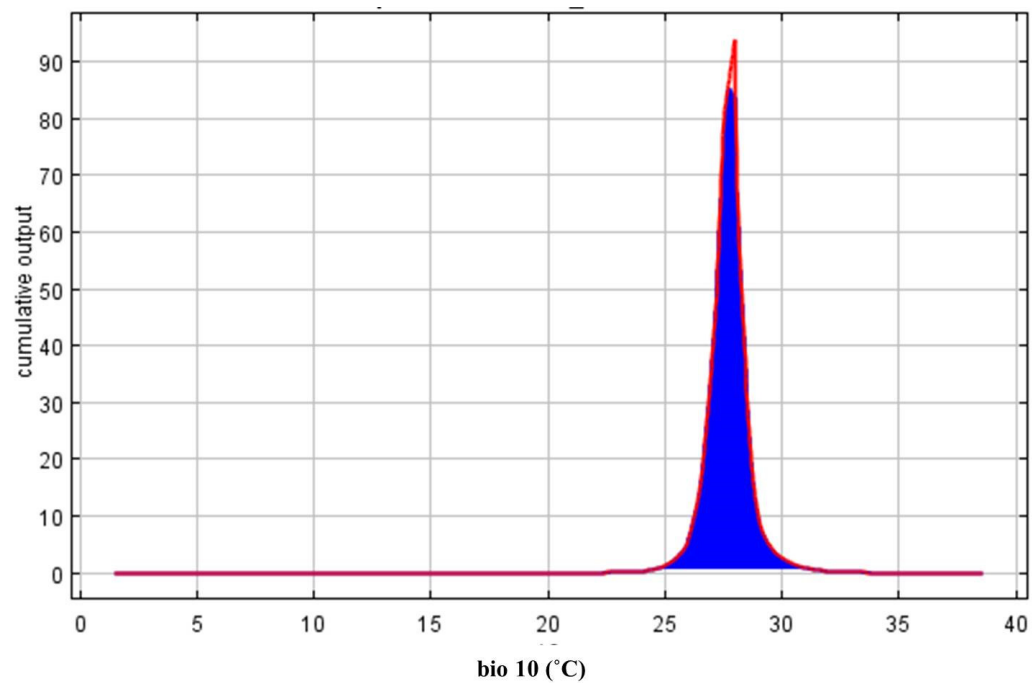

**Figure S9.** Response curve for Mean Temperature of Warmest Quarter (bio 10).

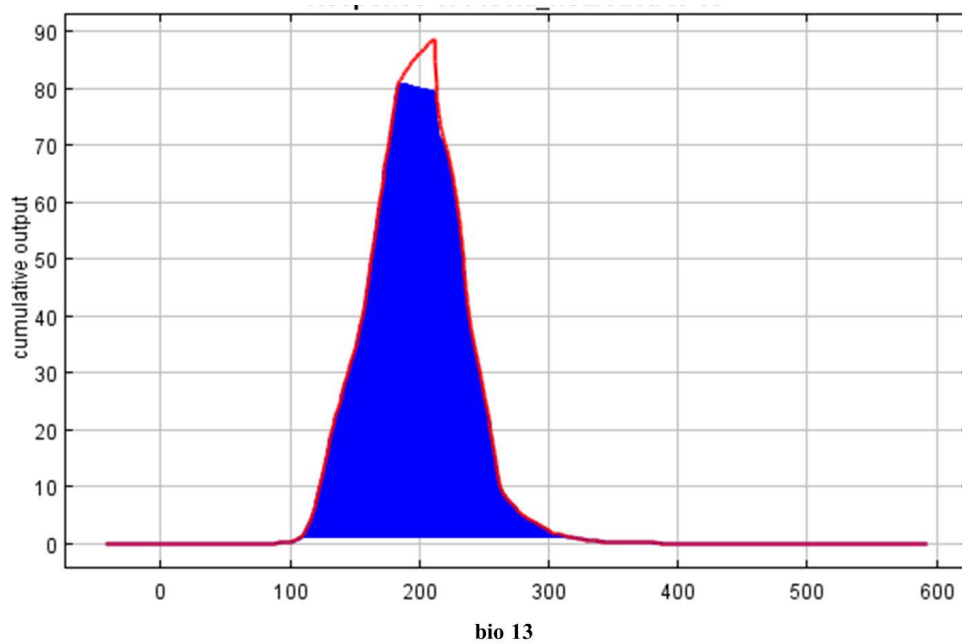

**Figure S10.** Response curve for Precipitation of Wettest Month (bio 13).

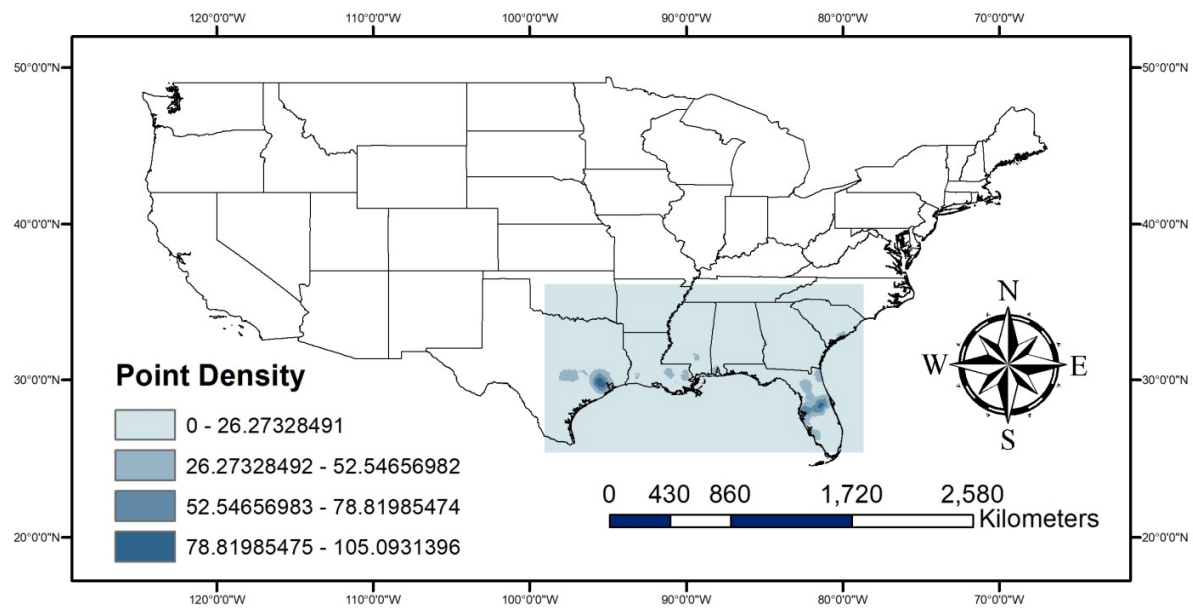

**Figure S11.** Density of the occurrence records (point density) in the study area. Point density reflects the number of points per area.
